# Supplementary material for: Crystal chemistry and thermoelectric transport of layered AM2X2compounds
Source: Royal Society of Chemistry journal article supplement (doi:10.1039/c7qi00813a), 2018-01-01
Supplement: c7qi00813a1.pdf [file c7qi00813a1.pdf]

# Supplemental information

March 6, 2018

Table 1: Compounds with the  $\text{CaAl}_2\text{Si}_2$  structure type.

|                             |            |                                       |          |                             |            |
|-----------------------------|------------|---------------------------------------|----------|-----------------------------|------------|
| compound                    | ref        | compound                              | ref      | compound                    | ref        |
| $\text{BaCd}_2\text{As}_2$  | [1, 2]     | $\text{CaZn}_2\text{Sb}_2$            | [3]      | $\text{SrMg}_2\text{Bi}_2$  | [4]        |
| $\text{BaCd}_2\text{P}_2$   | [1, 2]     | $\text{EuCd}_2\text{As}_2$            | [5]      | $\text{SrMg}_2\text{N}_2^*$ | [6]        |
| $\text{BaCd}_2\text{Sb}_2$  | [7]        | $\text{EuCd}_2\text{P}_2$             | [8]      | $\text{SrMg}_2\text{Sb}_2$  | [4]        |
| $\text{BaMg}_2\text{As}_2$  | [1, 4]     | $\text{EuCd}_2\text{Sb}_2$            | [8]      | $\text{SrMn}_2\text{As}_2$  | [9, 10]    |
| $\text{BaMg}_2\text{Bi}_2$  | [4]        | $\text{EuMg}_2\text{Bi}_2$            | [11]     | $\text{SrMn}_2\text{P}_2$   | [9]        |
| $\text{BaMg}_2\text{P}_2$   | [1]        | $\text{EuMg}_2\text{Sb}_2$            | [12]     | $\text{SrMn}_2\text{Sb}_2$  | [13]       |
| $\text{BaMg}_2\text{Sb}_2$  | [4]        | $\text{EuMn}_2\text{As}_2$            | [14]     | $\text{SrZn}_2\text{As}_2$  | [15]       |
| $\text{CaCd}_2\text{As}_2$  | [16]       | $\text{EuMn}_2\text{P}_2$             | [14]     | $\text{SrZn}_2\text{P}_2$   | [1, 2]     |
| $\text{CaCd}_2\text{P}_2$   | [16]       | $\text{EuMn}_2\text{Sb}_2$            | [14, 5]  | $\text{SrZn}_2\text{Sb}_2$  | [3]        |
| $\text{CaCd}_2\text{Sb}_2$  | [3]        | $\text{EuZn}_2\text{As}_2$            | [2]      | $\text{YbCd}_2\text{Sb}_2$  | [17, 8]    |
| $\text{CaMg}_2\text{As}_2$  | [4]        | $\text{EuZn}_2\text{P}_2$             | [2]      | $\text{YbMg}_2\text{Bi}_2$  | [11]       |
| $\text{CaMg}_2\text{Bi}_2$  | [4, 11]    | $\text{EuZn}_2\text{Sb}_2$            | [5, 2]   | $\text{YbMg}_2\text{Sb}_2$  | [12]       |
| $\text{CaMg}_2\text{N}_2^*$ | [6]        | $\text{Mg}(\text{MgMn})_2\text{As}_2$ | [18]     | $\text{YbMn}_2\text{As}_2$  | [14]       |
| $\text{CaMg}_2\text{Sb}_2$  | [4]        | $\text{MgMg}_2\text{As}_2$            | [18]     | $\text{YbMn}_2\text{Sb}_2$  | [5, 19]    |
| $\text{CaMn}_2\text{As}_2$  | [9, 10]    | $\text{MgMg}_2\text{Bi}_2$            | [20]     | $\text{YbZn}_2\text{As}_2$  | [2, 21]    |
| $\text{CaMn}_2\text{Bi}_2$  | [13]       | $\text{MgMg}_2\text{Sb}_2$            | [20, 22] | $\text{YbZn}_2\text{P}_2$   | [1, 23]    |
| $\text{CaMn}_2\text{P}_2$   | [9]        | $\text{SrCd}_2\text{As}_2$            | [15]     | $\text{YbZn}_2\text{Sb}_2$  | [2, 5, 17] |
| $\text{CaMn}_2\text{Sb}_2$  | [13]       | $\text{SrCd}_2\text{P}_2$             | [1, 2]   | $\text{SmMg}_2\text{Bi}_2$  | [24]       |
| $\text{CaZn}_2\text{As}_2$  | [16]       | $\text{SrCd}_2\text{Sb}_2$            | [3]      | $\text{SmMg}_2\text{Sb}_2$  | [24]       |
| $\text{CaZn}_2\text{P}_2$   | [16]       | $\text{SrMg}_2\text{As}_2$            | [4]      |                             |            |
| compound                    | ref        | compound                              | ref      | compound                    | ref        |
| $\text{CaAl}_2\text{Ge}_2$  | [25]       | $\text{MgAl}_2\text{Ge}_2$            | [26]     | $\text{YbAl}_2\text{Ge}_2$  | [27]       |
| $\text{CaAl}_2\text{Si}_2$  | [25]       | $\text{MgAl}_2\text{Si}_2$            | [28]     | $\text{YbAl}_2\text{Si}_2$  | [27]       |
| $\text{EuAl}_2\text{Ge}_2$  | [29]       | $\text{SrAl}_2\text{Ge}_2$            | [25]     |                             |            |
| $\text{EuAl}_2\text{Si}_2$  | [30], [27] | $\text{SrAl}_2\text{Si}_2$            | [25]     |                             |            |
| compound                    | ref        | compound                              | ref      | compound                    | ref        |
| $\text{CeAgZnAs}_2$         | [31]       | $\text{LaAgZnP}_2$                    | [32]     | $\text{SmAgZnAs}_2$         | [31]       |
| $\text{CeAgZnP}_2$          | [31]       | $\text{LaCuZnP}_2$                    | [32]     | $\text{SmAgZnP}_2$          | [32]       |
| $\text{CeCuZnAs}_2$         | [31]       | $\text{LuCuZnP}_2$                    | [33]     | $\text{SmCuZnAs}_2$         | [31]       |
| $\text{CeCuZnP}_2$          | [32]       | $\text{NdAgZnAs}_2$                   | [31]     | $\text{SmCuZnP}_2$          | [32]       |
| $\text{DyCuZnAs}_2$         | [31]       | $\text{NdAgZnP}_2$                    | [31]     | $\text{TbAgZnAs}_2$         | [31]       |
| $\text{DyCuZnP}_2$          | [33]       | $\text{NdCuZnAs}_2$                   | [31]     | $\text{TbCuZnAs}_2$         | [31]       |
| $\text{ErCuZnP}_2$          | [33]       | $\text{NdCuZnP}_2$                    | [33]     | $\text{TbCuZnP}_2$          | [33]       |
| $\text{GdAgZnAs}_2$         | [31]       | $\text{PrAgZnAs}_2$                   | [31]     | $\text{TmCuZnP}_2$          | [33]       |
| $\text{GdCuZnP}_2$          | [33]       | $\text{PrAgZnP}_2$                    | [31]     | $\text{YbCuZnP}_2$          | [34]       |
| $\text{HoCuZnP}_2$          | [33]       | $\text{PrCuZnP}_2$                    | [33]     | $\text{YbMnCuP}_2$          | [15]       |
| $\text{LaAgZnAs}_2$         | [31]       | $\text{ScCuZnP}_2$                    | [32]     | $\text{YCuZnP}_2$           | [32, 2]    |

Table 2: Compounds with the  $\text{CaAl}_2\text{Si}_2$  structure type, continued. Compounds with \* are not included in phase map in figure 3(d).

|                                               |          |                                               |      |                                               |          |
|-----------------------------------------------|----------|-----------------------------------------------|------|-----------------------------------------------|----------|
| compound                                      | ref      | compound                                      | ref  | compound                                      | ref      |
| $\text{CeLi}_2\text{As}_2$                    | [35]     | $\text{LaLi}_3\text{P}_2$                     | [36] | $\text{PrLi}_x\text{Cu}_{2-y}\text{P}_2^*$    | [37]     |
| $\text{CeLi}_3\text{Bi}_2$                    | [38]     | $\text{LaLi}_3\text{Sb}_2$                    | [36] | $\text{SmLi}_3\text{Bi}_2$                    | [38]     |
| $\text{CeLi}_3\text{Sb}_2$                    | [39]     | $\text{LaLi}_x\text{Cu}_{2-y}\text{P}_2^*$    | [37] | $\text{SmLi}_3\text{Sb}_2$                    | [39]     |
| $\text{DyLi}_3\text{Sb}_2$                    | [39]     | $\text{MdLi}_x\text{Cu}_{2-y}\text{P}_2^*$    | [37] | $\text{TbLi}_3\text{Bi}_2$                    | [38]     |
| $\text{ErLi}_x\text{Cu}_{2-y}\text{P}_2^*$    | [37]     | $\text{NdLi}_3\text{As}_2$                    | [36] | $\text{TbLi}_3\text{Sb}_2$                    | [39]     |
| $\text{GdLi}_3\text{Bi}_2$                    | [38]     | $\text{NdLi}_3\text{Bi}_2$                    | [38] | $\text{YLi}_3\text{Bi}_2$                     | [36]     |
| $\text{GdLi}_x\text{Cu}_{2-y}\text{P}_2^*$    | [37]     | $\text{NdLi}_3\text{Sb}_2$                    | [39] | $\text{YLi}_3\text{Sb}_2$                     | [36]     |
| $\text{HoLi}_3\text{Sb}_2$                    | [39]     | $\text{PrLi}_3\text{Bi}_2$                    | [38] |                                               |          |
| $\text{LaLi}_3\text{Bi}_2$                    | [38]     | $\text{PrLi}_3\text{Sb}_2$                    | [39] |                                               |          |
| compound                                      | ref      | compound                                      | ref  | compound                                      | ref      |
| $\text{NaCd}_{1.5}\text{Sn}_{0.5}\text{As}_2$ | [40]     | $\text{NaZn}_{1.5}\text{Sn}_{0.5}\text{As}_2$ | [40] | $\text{RbCd}_{1.5}\text{Sn}_{0.5}\text{As}_2$ | [40]     |
| $\text{NaZn}_{1.5}\text{Ge}_{0.5}\text{As}_2$ | [40]     | $\text{KZn}_{1.5}\text{Sn}_{0.5}\text{As}_2$  | [40] |                                               |          |
| $\text{NaZn}_{1.5}\text{Si}_{0.5}\text{As}_2$ | [40]     | $\text{KCd}_{1.5}\text{Sn}_{0.5}\text{As}_2$  | [40] |                                               |          |
| compound                                      | ref      | compound                                      | ref  | compound                                      | ref      |
| $\text{NaFe}_{1.6}\text{S}_2$                 | [41]     |                                               |      |                                               |          |
| compound                                      | ref      | compound                                      | ref  | compound                                      | ref      |
| $\text{CeAl}_2\text{Ge}_2$                    | [42, 43] | $\text{LuAl}_2\text{Ge}_2$                    | [44] | $\text{TbAl}_2\text{Si}_2$                    | [45]     |
| $\text{DyAl}_2\text{Si}_2$                    | [45]     | $\text{NdAl}_2\text{Ge}_2$                    | [44] | $\text{YAl}_2\text{Ge}_2$                     | [46, 44] |
| $\text{GdAl}_2\text{Ge}_2$                    | [44]     | $\text{PrAl}_2\text{Si}_2$                    | [47] | $\text{YAl}_2\text{Si}_2$                     | [46, 45] |
| $\text{GdAl}_2\text{Si}_2$                    | [48]     | $\text{SmAl}_2\text{Si}_2$                    | [45] |                                               |          |
| $\text{LaAl}_2\text{Ge}_2$                    | [42, 44] | $\text{TbAl}_2\text{Ge}_2$                    | [44] |                                               |          |
| $\text{GdAlZnGe}_2$                           | [45]     |                                               |      |                                               |          |

Table 3: Compounds with  $\text{VEC}=16$  forming the  $\text{ThCr}_2\text{Si}_2$  structure type.

|                            |      |                                              |      |                                               |      |
|----------------------------|------|----------------------------------------------|------|-----------------------------------------------|------|
| compound                   | ref  | compound                                     | ref  | compound                                      | ref  |
| $\text{BaMn}_2\text{As}_2$ | [10] | $\text{BaPd}_2\text{As}_2$                   | [49] | $\text{KZn}_{1.5}\text{Si}_{0.5}\text{As}_2$  | [50] |
| $\text{BaMn}_2\text{Bi}_2$ | [51] | $\text{BaZn}_2\text{P}_2$                    | [52] | $\text{RbZn}_{1.5}\text{Ge}_{0.5}\text{As}_2$ | [50] |
| $\text{BaMn}_2\text{P}_2$  | [9]  | $\text{KFe}_2\text{AsSe}$                    | [53] |                                               |      |
| $\text{BaMn}_2\text{Sb}_2$ | [7]  | $\text{KZn}_{1.5}\text{Ge}_{0.5}\text{As}_2$ | [50] |                                               |      |

Table 4: Compounds with  $\text{VEC}=16$  forming the  $\text{BaCu}_2\text{S}_2$  structure type.

|                            |      |                                   |      |                            |      |
|----------------------------|------|-----------------------------------|------|----------------------------|------|
| compound                   | ref  | compound                          | ref  | compound                   | ref  |
| $\text{BaAl}_2\text{Si}_2$ | [54] | $\alpha\text{-BaCu}_2\text{S}_2$  | [55] | $\text{BaAl}_2\text{Ge}_2$ | [56] |
| $\text{BaZn}_2\text{As}_2$ | [52] | $\alpha\text{-BaCu}_2\text{Se}_2$ | [55] |                            |      |
| $\text{BaZn}_2\text{Sb}_2$ | [7]  | $\alpha\text{-BaCu}_2\text{Te}_2$ | [57] |                            |      |

Table 5: Source data for Figure 8b) and Figure 9. The room temperature Seebeck coefficients,  $\alpha$ , electrical conductivity,  $\sigma$ , Hall mobility,  $\mu_H$ , and total thermal conductivity as  $\kappa_{total}$ , are obtained from the literature. The Lorenz numbers,  $L$ , are estimated using an effective mass model. The electronic thermal conductivity,  $\kappa_e$ , and lattice thermal conductivity,  $\kappa_L$ , are calculated from the Wiedemann–Franz law using the corresponding  $\sigma$ . The transverse and longitudinal speed of sound ( $v_t$  and  $v_l$ ) are from the predicted elastic modulus [58] and density. The mean speed of sound,  $v_s$  calc, is obtained through  $(2v_t+v_l)/3$ .

| Ref. | Compound                                                              | $\alpha$<br>$\mu V K^{-1}$ | $L \times 10^8$<br>$W \Omega K^{-2}$ | $\sigma$<br>$S/m$  | $\kappa_e$<br>$W/(mK)$ | $\kappa_{total}$<br>$W/(mK)$ | $\kappa_L$<br>$W/(mK)$ | $v_s$ calc.<br>$m/s$ | $\mu_H$<br>$cm^2/(Vs)$ |
|------|-----------------------------------------------------------------------|----------------------------|--------------------------------------|--------------------|------------------------|------------------------------|------------------------|----------------------|------------------------|
| [59] | Mg <sub>3</sub> Sb <sub>2</sub>                                       | 193                        | 1.58                                 | $2.11 \times 10^2$ | $9.8 \times 10^{-4}$   | 1.33                         | 1.3                    | 2790                 |                        |
| [60] | YbCd <sub>2</sub> Sb <sub>2</sub>                                     | 115                        | 1.75                                 | $4.56 \times 10^4$ | $2.40 \times 10^{-1}$  | 2.04                         | 1.80                   | 2160                 | 73                     |
|      | CaCd <sub>2</sub> Sb <sub>2</sub>                                     | 261                        | 1.55                                 | $2.50 \times 10^2$ | $1.16 \times 10^{-3}$  | 1.06                         | 1.06                   | 2381                 |                        |
| [61] | YbZn <sub>2</sub> Sb <sub>2</sub>                                     | 48                         | 2.3                                  | $3.13 \times 10^5$ | 2.16                   | 4.25                         | 2.09                   | 2379                 | 130                    |
|      | CaZn <sub>2</sub> Sb <sub>2</sub>                                     | 120                        | 1.81                                 | $4.22 \times 10^4$ | $2.29 \times 10^{-1}$  | 2.60                         | 2.37                   | 2480                 | 83                     |
| [62] | YbCd <sub>2</sub> Sb <sub>2</sub>                                     | 124                        | 1.82                                 | $4.90 \times 10^4$ | $2.68 \times 10^{-1}$  | 2.25                         | 1.99                   | 2117                 | 72                     |
|      | YbCd <sub>1.95</sub> Mn <sub>0.25</sub> Sb <sub>2</sub>               | 138                        | 1.75                                 | $4.25 \times 10^3$ | $2.23 \times 10^{-2}$  | 1.95                         | 1.93                   | 2117                 | 73                     |
|      | YbMn <sub>2</sub> Sb <sub>2</sub>                                     | 10                         | 2.4                                  | $6.25 \times 10^3$ | $4.50 \times 10^{-2}$  | 2.75                         | 2.71                   | 2055                 |                        |
| [63] | CaZn <sub>2</sub> Sb <sub>2</sub>                                     | 115                        | 1.75                                 | $8.00 \times 10^4$ | $4.20 \times 10^{-1}$  | 2.91                         | 2.49                   | 2480                 |                        |
|      | YbZn <sub>2</sub> Sb <sub>2</sub>                                     | 100                        | 1.9                                  | $1.33 \times 10^5$ | $7.58 \times 10^{-1}$  | 2.60                         | 1.84                   | 2379                 |                        |
| [64] | EuMg <sub>2</sub> Bi <sub>2</sub>                                     | 102                        | 1.9                                  | $9.35 \times 10^4$ | $5.33 \times 10^{-1}$  | 4.72                         | 4.19                   | 2228                 |                        |
|      | CaMg <sub>2</sub> Bi <sub>2</sub>                                     | 288                        | 1.54                                 | $5.30 \times 10^3$ | $2.45 \times 10^{-2}$  | 2.93                         | 2.91                   | 2486                 | 143                    |
|      | YbMg <sub>2</sub> Bi <sub>2</sub>                                     | 209                        | 1.6                                  | $1.33 \times 10^4$ | $6.38 \times 10^{-2}$  | 2.68                         | 2.62                   | 2133                 | 119                    |
| [65] | SrZn <sub>2</sub> Sb <sub>2</sub>                                     | 159                        | 1.69                                 | $2.22 \times 10^4$ | $1.13 \times 10^{-1}$  | 2.05                         | 1.94                   | 2366                 |                        |
|      | CaZn <sub>2</sub> Sb <sub>2</sub>                                     | 120                        | 1.81                                 | $4.22 \times 10^4$ | $2.29 \times 10^{-1}$  | 2.60                         | 2.37                   | 2480                 |                        |
|      | YbZn <sub>2</sub> Sb <sub>2</sub>                                     | 48                         | 2.3                                  | $3.13 \times 10^5$ | 2.16                   | 4.25                         | 2.09                   | 2379                 |                        |
|      | EuZn <sub>2</sub> Sb <sub>2</sub>                                     | 120                        | 1.81                                 | $1.14 \times 10^5$ | $6.17 \times 10^{-1}$  | 2.50                         | 1.88                   | 2401                 |                        |
| [66] | YbCd <sub>2</sub> Sb <sub>2</sub>                                     | 118                        | 1.75                                 | $4.60 \times 10^4$ | $2.42 \times 10^{-1}$  | 2.10                         | 1.86                   | 2160                 | 73                     |
|      | YbZn <sub>2</sub> Sb <sub>2</sub>                                     | 45                         | 2.2                                  | $2.16 \times 10^5$ | 1.43                   | 3.80                         | 2.37                   | 2379                 | 119                    |
| [67] | CaZn <sub>2</sub> Sb <sub>2</sub>                                     | 120                        | 1.81                                 | $3.20 \times 10^4$ | $1.74 \times 10^{-1}$  | 3.89                         | 3.72                   | 2480                 | 63.6                   |
| [68] | YbZn <sub>2</sub> Sb <sub>2</sub>                                     | 53                         | 2.19                                 | $1.58 \times 10^5$ | 1.04                   | 3.23                         | 2.20                   | 2379                 | 85                     |
| [69] | EuZn <sub>2</sub> Sb <sub>2</sub>                                     | 120                        | 1.81                                 | $1.13 \times 10^4$ | $6.14 \times 10^{-2}$  | 2.62                         | 2.56                   | 2401                 |                        |
| [70] | EuCd <sub>2</sub> Sb <sub>2</sub>                                     | 229                        | 1.58                                 | $1.11 \times 10^4$ | $5.26 \times 10^{-2}$  | 1.40                         | 1.35                   | 2133                 |                        |
| [71] | EuCd <sub>2</sub> Sb <sub>2</sub>                                     | 222                        | 1.59                                 | $1.16 \times 10^4$ | $5.53 \times 10^{-2}$  | 1.40                         | 1.35                   | 2133                 |                        |
|      | CaCd <sub>2</sub> Sb <sub>2</sub>                                     | 262                        | 1.55                                 | $6.67 \times 10^4$ | $3.10 \times 10^{-1}$  | 1.06                         | 0.75                   | 2381                 |                        |
| [72] | SrZn <sub>2</sub> Sb <sub>2</sub>                                     | 167                        | 1.69                                 | $3.50 \times 10^3$ | $1.77 \times 10^{-2}$  | 2.20                         | 2.18                   | 2366                 |                        |
| [73] | YbCd <sub>2</sub> Sb <sub>2</sub>                                     | 169                        | 1.69                                 | $3.30 \times 10^4$ | $1.67 \times 10^{-1}$  | 2.08                         | 1.91                   | 2160                 |                        |
| [74] | YbZn <sub>2</sub> Sb <sub>2</sub>                                     | 58                         | 2.16                                 | $2.10 \times 10^5$ | 1.36                   | 4.13                         | 2.76                   | 2379                 |                        |
|      | La <sub>0.01</sub> Yb <sub>0.99</sub> Zn <sub>2</sub> Sb <sub>2</sub> | 63                         | 2.14                                 | $1.67 \times 10^5$ | 1.07                   | 3.50                         | 2.43                   | 2379                 |                        |
| [75] | YbZn <sub>2</sub> Sb <sub>2</sub>                                     | 130                        | 1.52                                 | $4.55 \times 10^4$ | $2.07 \times 10^{-1}$  | 2.90                         | 2.69                   | 2379                 | 115                    |
|      | Yb <sub>0.99</sub> Zn <sub>2</sub> Sb <sub>2</sub>                    | 65                         | 2.14                                 | $1.67 \times 10^5$ | 1.07                   | 2.40                         | 1.33                   | 2379                 | 90                     |
| [76] | Mg <sub>3</sub> Sb <sub>2</sub>                                       | 313                        | 1.5                                  | $9.52 \times 10^2$ | $4.29 \times 10^{-3}$  | 1.40                         | 1.40                   | 2790                 | 28.3                   |
|      | Mg <sub>2.995</sub> Ag <sub>0.005</sub> Sb <sub>2</sub>               | 162                        | 1.68                                 | $1.22 \times 10^4$ | $6.15 \times 10^{-2}$  | 1.45                         | 1.39                   | 2790                 | 50.1                   |
|      | Mg <sub>2.990</sub> Ag <sub>0.010</sub> Sb <sub>2</sub>               | 177                        | 1.65                                 | $1.04 \times 10^4$ | $5.16 \times 10^{-2}$  | 1.35                         | 1.30                   | 2790                 | 47.6                   |
|      | Mg <sub>2.985</sub> Ag <sub>0.015</sub> Sb <sub>2</sub>               | 177                        | 1.65                                 | $1.18 \times 10^4$ | $5.82 \times 10^{-2}$  | 1.25                         | 1.19                   | 2790                 | 47.3                   |
|      | Mg <sub>2.980</sub> Ag <sub>0.020</sub> Sb <sub>2</sub>               | 165                        | 1.68                                 | $1.03 \times 10^4$ | $5.20 \times 10^{-2}$  | 1.30                         | 1.24                   | 2790                 | 48.9                   |
| [77] | Mg <sub>3</sub> Sb <sub>2</sub>                                       | 1000                       | 1.5                                  | 1.00               | $4.50 \times 10^{-6}$  | 1.40                         | 1.35                   | 2790                 | 23.2                   |
|      | Mg <sub>2.994</sub> Na <sub>0.006</sub> Sb <sub>2</sub>               | 110                        | 1.9                                  | $1.04 \times 10^4$ | $5.94 \times 10^{-2}$  | 1.60                         | 1.60                   | 2790                 | 16.7                   |
|      | Mg <sub>0.975</sub> Na <sub>0.025</sub> Sb <sub>2</sub>               | 100                        | 1.9                                  | $2.08 \times 10^4$ | $1.19 \times 10^{-1}$  | 1.70                         | 1.64                   | 2790                 | 15.9                   |
| [78] | CaMg <sub>2</sub> Sb <sub>2</sub>                                     |                            |                                      |                    |                        |                              | 4.55                   | 3207                 |                        |

Table 6: Source data for figure 8a). Hall carrier concentration,  $n_H$ , Seebeck coefficient,  $\alpha$ , and Hall mobility,  $\mu_H$ , for  $p$ -type  $AM_2X_2$  compounds.

| Compound [Ref.]                                                           | $n_H \times 10^{-19}$<br>carriers/cm <sup>3</sup> | $\alpha$<br>$\mu V K^{-1}$ | $\mu_H$<br>$cm^2/(Vs)$ | Compound [Ref.]                                                                                               | $n_H \times 10^{19}$<br>carriers/cm <sup>3</sup> | $\alpha$<br>$\mu V K^{-1}$ | $\mu_H$<br>$cm^2/(Vs)$ |
|---------------------------------------------------------------------------|---------------------------------------------------|----------------------------|------------------------|---------------------------------------------------------------------------------------------------------------|--------------------------------------------------|----------------------------|------------------------|
| YbZn <sub>2-x</sub> Mn <sub>x</sub> Sb <sub>2</sub> [68]                  |                                                   |                            |                        | Yb <sub>1-x</sub> Ca <sub>x</sub> Cd <sub>2</sub> Sb <sub>2</sub> [60]                                        |                                                  |                            |                        |
| 0                                                                         | 11.5                                              | 51                         | 85                     | 0                                                                                                             | 3.9                                              | 115                        | 73                     |
| 0.05                                                                      | 9                                                 | 85                         | 56                     | 0.2                                                                                                           | 2.66                                             | 128                        | 82                     |
| 0.1                                                                       | 7.2                                               | 69                         | 88                     | 0.4                                                                                                           | 1.88                                             | 149                        | 104                    |
| 0.15                                                                      | 8.3                                               | 924                        | 59                     | 0.5                                                                                                           | 1.94                                             | 149                        | 91                     |
| 0.2                                                                       | 6.6                                               | 64                         | 38                     | 0.6                                                                                                           | 1.12                                             | 161                        | 135                    |
| 0.3                                                                       | 6                                                 | 87                         | 54                     | 0.8                                                                                                           | 0.33                                             | 216                        | 114                    |
| Ca <sub>1-x</sub> Eu <sub>x</sub> Zn <sub>2</sub> Sb <sub>2</sub> [67]    |                                                   |                            |                        | Yb <sub>1-x</sub> Zn <sub>2</sub> Sb <sub>2</sub> [75]                                                        |                                                  |                            |                        |
| 0                                                                         | 3.04                                              | 120                        | 63.6                   | 0.98                                                                                                          | 2.38                                             | 131                        | 120                    |
| 0.1                                                                       | 3.29                                              | 112                        | 117.4                  | 0.99                                                                                                          | 2.04                                             | 121                        | 115                    |
| 0.3                                                                       | 3.59                                              | 110                        | 120.8                  | 1                                                                                                             | 3.09                                             | 118                        | 90                     |
| 0.7                                                                       | 3.81                                              | 111                        | 123.6                  | 1.025                                                                                                         | 9.06                                             | 62                         | 75                     |
| 0.9                                                                       | 3.83                                              | 111                        | 140                    | 1.05                                                                                                          | 15                                               | 40                         | 92                     |
| 1                                                                         | 2.94                                              | 112                        | 186.2                  | (Eu <sub>0.5</sub> Yb <sub>0.5</sub> ) <sub>1-x</sub><br>Ca <sub>x</sub> Mg <sub>2</sub> Bi <sub>2</sub> [64] |                                                  |                            |                        |
| YbCd <sub>2-x</sub> Zn <sub>x</sub> Sb <sub>2</sub> [66]                  |                                                   |                            |                        | 0                                                                                                             | 3.99                                             | 105                        | 200                    |
| 0                                                                         | 3.9                                               | 116                        | 73                     | 0.4                                                                                                           | 2.74                                             | 126                        | 180                    |
| 0.4                                                                       | 6                                                 | 101                        | 118                    | 0.5                                                                                                           | 2.26                                             | 148                        | 166                    |
| 0.8                                                                       | 7.2                                               | 68                         | 93                     | 0.6                                                                                                           | 1.7                                              | 162                        | 171                    |
| 1                                                                         | 8.6                                               | 66                         | 103                    | 0.7                                                                                                           | 1.41                                             | 172                        | 164                    |
| 1.2                                                                       | 9.1                                               | 55                         | 104                    | EuMg <sub>2</sub> Bi <sub>2</sub>                                                                             | 4.33                                             | 102                        | 202                    |
| 1.6                                                                       | 10.3                                              | 40                         | 123                    | Eu <sub>0.5</sub> Ca <sub>0.5</sub> Mg <sub>2</sub> Bi <sub>2</sub>                                           | 3.07                                             | 128                        | 159                    |
| 2                                                                         | 11.4                                              | 45                         | 119                    | Mg <sub>3</sub> Sb <sub>2-x</sub> Bi <sub>x</sub> [59]                                                        |                                                  |                            |                        |
| Ca <sub>1-x</sub> Na <sub>x</sub> Mg <sub>2</sub> Bi <sub>1.98</sub> [79] |                                                   |                            |                        | 0                                                                                                             | 11                                               | 192                        | 30                     |
| 0                                                                         | 0.35                                              | 256                        | 138                    | 0.1                                                                                                           | 19                                               | 275                        | 25                     |
| 0.0025                                                                    | 1.84                                              | 160                        | 144                    | 0.15                                                                                                          | 23                                               | 310                        | 22.2                   |
| 0.005                                                                     | 2.53                                              | 138                        | 147                    | 0.2                                                                                                           | 29                                               | 305                        | 18.6                   |
| 0.0075                                                                    | 4.4                                               | 103                        | 154                    | 0.25                                                                                                          | 42                                               | 237                        | 13.9                   |
| Ca <sub>1-x</sub> Yb <sub>x</sub> Mg <sub>2</sub> Bi <sub>2</sub> [80]    |                                                   |                            |                        | 0.4                                                                                                           | 150                                              | 141                        | 36.9                   |
| 0                                                                         | 0.24                                              | 288                        | 143                    | Mg <sub>3-x</sub> Ag <sub>x</sub> Sb <sub>2</sub> [76]                                                        |                                                  |                            |                        |
| 0.3                                                                       | 0.28                                              | 263                        | 153                    | 0                                                                                                             | 0.18                                             | 316                        | 28.3                   |
| 0.5                                                                       | 0.34                                              | 260                        | 138                    | 0.05                                                                                                          | 1.52                                             | 163                        | 50.1                   |
| 0.7                                                                       | 0.42                                              | 247                        | 131                    | 0.02                                                                                                          | 1.36                                             | 167                        | 47.6                   |
| 1                                                                         | 0.72                                              | 210                        | 119                    | 0.025                                                                                                         | 1.27                                             | 174                        | 47.3                   |
| YbCd <sub>2-x</sub> Mn <sub>x</sub> Sb <sub>2</sub> [62]                  |                                                   |                            |                        | 0.01                                                                                                          | 1.23                                             | 175                        | 48.9                   |
| 0                                                                         | 4.3                                               | 125                        | 72                     | 0.015                                                                                                         | 1.5                                              | 178                        | 43.7                   |
| 0.05                                                                      | 3.6                                               | 139                        | 73                     | Mg <sub>3-x</sub> Na <sub>x</sub> Sb <sub>2</sub> [77]                                                        |                                                  |                            |                        |
| 0.1                                                                       | 2.8                                               | 135                        | 63                     | 0.006                                                                                                         | 3.87                                             | 117                        | 16.7                   |
| 0.15                                                                      | 2.2                                               | 162                        | 64                     | 0.02                                                                                                          | 1.36                                             | 167                        | 47.6                   |
| 0.2                                                                       | 2.1                                               | 161                        | 74                     | 0.0125                                                                                                        | 8.41                                             | 89                         | 15.9                   |
| 0.4                                                                       | 1.7                                               | 181                        | 54                     | 0.025                                                                                                         | 17.1                                             | 73                         | 12.6                   |
| 0.6                                                                       | 1.1                                               | 192                        | 53                     | 0.015                                                                                                         | 1.5                                              | 177                        | 43.7                   |
| Ca <sub>x</sub> Yb <sub>1-x</sub> Zn <sub>2</sub> Sb <sub>2</sub> [61]    |                                                   |                            |                        |                                                                                                               |                                                  |                            |                        |
| 0                                                                         | 15                                                | 48                         | 130                    |                                                                                                               |                                                  |                            |                        |
| 0.25                                                                      | 8.9                                               | 58                         | 72                     |                                                                                                               |                                                  |                            |                        |
| 0.5                                                                       | 6.4                                               | 79                         | 76                     |                                                                                                               |                                                  |                            |                        |
| 0.75                                                                      | 5.7                                               | 96                         | 50                     |                                                                                                               |                                                  |                            |                        |
| 1                                                                         | 3.1                                               | 120                        | 83                     |                                                                                                               |                                                  |                            |                        |

Table 7: Hall carrier concentration, Seebeck coefficient and Hall mobility for all  $n$ -type  $AM_2X_2$  compounds. Source data for figure 7(b) in the paper. Here, we define Hall carrier concentration as  $n_H$ , Seebeck coefficient as  $\alpha$ , Hall mobility as  $\mu_H$ .

| Compound [Ref.]                                                                    | $n_H \times 10^{-19}$<br>carriers/ $cm^3$ | $\alpha$<br>$\mu_H V K^{-1}$ | $n_H$<br>$cm^2 / (Vs)$ |
|------------------------------------------------------------------------------------|-------------------------------------------|------------------------------|------------------------|
| Mg <sub>3.07</sub> Sb <sub>1.5</sub> Bi <sub>0.5-x</sub> Se <sub>x</sub> [81]      |                                           |                              |                        |
| 0.02                                                                               | 0.88                                      | 276                          | 76                     |
| 0.03                                                                               | 0.70                                      | 280                          | 64                     |
| 0.04                                                                               | 0.68                                      | 281                          | 63                     |
| 0.05                                                                               | 0.77                                      | 279                          | 60                     |
| 0.06                                                                               | 0.64                                      | 296                          | 61                     |
| Mg <sub>3</sub> Sb <sub>1.5-0.5x</sub> Bi <sub>0.5-0.5x</sub> Te <sub>x</sub> [82] |                                           |                              |                        |
| 0.04                                                                               | 2.21                                      | 208                          |                        |
| 0.05                                                                               | 2.17                                      | 214                          |                        |
| 0.08                                                                               | 2.06                                      | 221                          |                        |
| 0.2                                                                                | 1.81                                      | 227                          |                        |

## References

- [1] P. Klüfers and A. Mewis *Z. Kristallogr. Cryst. Mater*, vol. 169, no. 1-4, pp. 135–148, 1984.
- [2] P. Klüfers, H. Neumann, A. Mewis, and H.-U. Schuster *Z. Naturforsch. B Chem. Sci.*, vol. 35, no. 10, pp. 1317–1318, 1980.
- [3] A. Mewis *Z. Naturforsch. B*, vol. 33, no. 4, pp. 382–384, 1978.
- [4] K. Deller and B. Eisenmann *Z. Naturforsch. B Chem. Sci.*, vol. 32, no. 6, pp. 612–616, 1977.
- [5] I. Schellenberg, M. Eul, W. Hermes, and R. Pöttgen *Z. Anorg. Allg. Chem*, vol. 636, no. 1, pp. 85–93, 2010.
- [6] O. Reckeweg and F. J. DiSalvo *Z. Anorg. Allg. Chem*, vol. 627, no. 3, pp. 371–377, 2001.
- [7] E. Brechtel, G. Cordier, and H. Schäfer *Z. Naturforsch. B*, vol. 34, no. 7, pp. 921–925, 1979.
- [8] A. Artmann, A. Mewis, M. Roepke, and G. Michels *Z. Anorg. Allg. Chem*, vol. 622, no. 4, pp. 679–682, 1996.
- [9] A. Mewis *Z. Naturforsch. B*, vol. 33, no. 6, pp. 606–609, 1978.
- [10] E. Brechtel, G. Cordier, and H. Schäfer *Z. Naturforsch. B*, vol. 33, no. 7, pp. 820–822, 1978.
- [11] A. F. May, M. A. McGuire, D. J. Singh, R. Custelcean, and G. E. Jellison Jr *Inorg. Chem.*, vol. 50, no. 21, pp. 11127–11133, 2011.
- [12] F. Wartenberg, C. Kranenberg, R. Pocha, D. Johrendt, A. Mewis, R.-D. Hoffmann, B. D. Mosel, and R. Poettgen *Z. Naturforsch. B Chem. Sci.*, vol. 57, no. 11, pp. 1270–1276, 2002.
- [13] G. Cordier and H. Schäfer *Z. Naturforsch. B Chem. Sci.*, vol. 31, no. 11, pp. 1459–1461, 1976.
- [14] R. Rühl and W. Jeitschko *Materials Research Bulletin*, vol. 14, no. 4, pp. 513–517, 1979.
- [15] A. Mewis *Z. Naturforsch. Teil B, Anorg. Chem.*, vol. 35, no. 1-4, pp. 939–941, 1980.
- [16] P. Klüfers and A. Mewis *Z. Naturforsch. B*, vol. 33, no. 2, pp. 151–155, 1978.
- [17] O. Y. Zelinska, A. Tkachuk, A. Grosvenor, and A. Mar *Chem. of metals and alloys*, no. 1, 2, pp. 204–209, 2008.
- [18] R. Juza and R. Kroebel *Z. Anorg. Allg. Chem*, vol. 331, no. 3-4, pp. 187–199, 1964.
- [19] A. Morozkin, O. Isnard, P. Henry, S. Granovsky, R. Nirmala, and P. Manfrinetti *J. Alloys Compd.*, vol. 420, no. 1, pp. 34–36, 2006.
- [20] E. Zintl and E. Husemann *Z. Phys. Chem.*, vol. 21, no. 1, pp. 138–155, 1933.
- [21] A. Nateprov, J. Cisowski, J. Heimann, and I. Mirebeau *J. Alloys Compd.*, vol. 290, no. 1, pp. 6–9, 1999.
- [22] M. Martinez-Ripoll, A. Haase, and G. Brauer *Acta Crystallogr. B*, vol. 30, no. 8, pp. 2006–2009, 1974.

- [23] G. Zwiener, H. Neumann, and H.-U. Schuster *Z. Naturforsch. B Chem. Sci.*, vol. 36, no. 9, pp. 1195–1197, 1981.
- [24] D. Ramirez, A. Gallagher, R. Baumbach, and T. Siegrist *J. Solid State Chem.*, vol. 231, pp. 217–222, 2015.
- [25] P. O. Gladyshevskii, E.I.;Kripyakevich *Ukr. J. Phys*, vol. 12, pp. 447–452, 1967.
- [26] S. Pukas, L. Pylypchak, O. Matselko, P. Demchenko, and R. Gladyshevskii *Chem. Met. Alloys*, vol. 5, pp. 59–65, 2012.
- [27] C. Kranenberg, D. Johrendt, A. Mewis, R. Pöttgen, G. Kotzyba, C. Rosenhahn, and B. D. Mosel *Solid State Sci.*, vol. 2, no. 2, pp. 215–222, 2000.
- [28] S. Andersen, C. Marioara, R. Vissers, A. Frøseth, and H. Zandbergen *Mater. Sci. and Eng. A*, vol. 444, no. 1, pp. 157–169, 2007.
- [29] P. Schobinger-Papamantellos and F. Hulliger *J. Less Common Met.*, vol. 146, pp. 327–335, 1989.
- [30] O. Zarechnyuk and T. Janson *Dopov. Akad. Nauk Ukr. RSR, Ser. B: Geol., Khim. Biol. Nauki*, vol. 4, pp. 30–31, 1982.
- [31] S. S. Stoyko, K. K. Ramachandran, P. E. Blanchard, K. A. Rosmus, J. A. Aitken, and A. Mar *J. Solid State Chem.*, vol. 213, pp. 275–286, 2014.
- [32] A. Mahan and A. Mewis *Z. Naturforsch. B Chem. Sci.*, vol. 38, no. 9, pp. 1041–1045, 1983.
- [33] P. E. Blanchard, S. S. Stoyko, R. G. Cavell, and A. Mar *J. Solid State Chem.*, vol. 184, no. 1, pp. 97–103, 2011.
- [34] P. Klüfers, A. Mewis, and H.-U. Schuster *Z. Kristallogr. Cryst. Mater*, vol. 149, no. 1-4, pp. 211–226, 1979.
- [35] H.-U. Schuster and H.-O. Fischer *Z. Naturforsch.*, vol. 34b, pp. 1169–1170, 1979.
- [36] I. Grund, H.-U. Schuster, and P. Müller *Z. Anorg. Allg. Chem.*, vol. 515, no. 8, pp. 151–158, 1984.
- [37] E. Jang, G. Nam, H. Woo, J. Lee, M.-K. Han, S.-J. Kim, and T.-S. You *Eur. J. Inorg. Chem.*, vol. 2015, no. 17, pp. 2786–2793, 2015.
- [38] J. Prakash, M. C. Schäfer, and S. Bobev *Acta Crystallogr. C*, vol. 71, no. 10, pp. 894–899, 2015.
- [39] M. C. Schäfer, N. T. Suen, M. Raglione, and S. Bobev *J. Solid State Chem.*, vol. 210, no. 1, pp. 89–95, 2014.
- [40] M. Khatun, S. S. Stoyko, and A. Mar *Inorg. Chem.*, vol. 52, no. 6, pp. 3148–3158, 2013.
- [41] X. Lai, X. Chen, S. Jin, G. Wang, T. Zhou, T. Ying, H. Zhang, S. Shen, and W. Wang *Inorg. Chem.*, vol. 52, no. 22, pp. 12860–12862, 2013.
- [42] A. Muravyeva and O. Zarechnyuk *Inorg. Mater*, vol. 6, pp. 933–934, 1970.
- [43] H. Flandorfer, D. Kaczorowski, J. Gröbner, P. Rogl, R. Wouters, C. Godart, and A. Kostikas *J. Solid State Chem.*, vol. 137, no. 2, pp. 191–205, 1998.



- [44] C. Kranenberg, D. Johrendt, and A. Mewis *Solid State Sci.*, vol. 4, no. 2, pp. 261–265, 2002.
- [45] C. Kranenberg, D. Johrendt, and A. Mewis *Z. Anorg. Allg. Chem.*, vol. 625, no. 11, pp. 1787–1793, 1999.
- [46] A. Muraveva, O. Zarechnyuk, and E. Gladyshevskii *Inorg. Mater. (USSR) (Engl. Transl.)*, vol. 7, no. 1, pp. 34–36, 1971.
- [47] N. Muts, R. Gladyshevskii, and E. Gladyshevskii *J. Alloys Compd.*, vol. 402, no. 1, pp. 66–69, 2005.
- [48] R. Xesper and H. G. v. Schnering *Z. Naturforsch. B Chem. Sci.*, vol. 37, no. 12, pp. 1514–1517, 1982.
- [49] Q. Guo, J. Yu, B.-B. Ruan, D.-Y. Chen, X.-C. Wang, Q.-G. Mu, B.-J. Pan, G.-F. Chen, and Z.-A. Ren *EPL*, vol. 113, no. 1, p. 17002, 2016.
- [50] M. Khatun, S. S. Stoyko, and A. Mar *Inorg. Chem.*, vol. 52, no. 6, pp. 3148–58, 2013.
- [51] B. Saparov and A. S. Sefat *J. Solid State Chem.*, vol. 204, pp. 32–39, 2013.
- [52] P. Klufers and A. Mewis *Z. Naturforsch. B*, vol. 32, no. 7, pp. 753–756, 1977.
- [53] I. R. Shein and A. L. Ivanovskii *Phys. Rev. B*, vol. 84, p. 184509, 2011.
- [54] C. L. Condron, H. Hope, P. M. Piccoli, A. J. Schultz, and S. M. Kauzlarich *Inorg. Chem.*, vol. 46, no. 11, pp. 4523–4529, 2007.
- [55] J. Iglesias, K. Pachali, and H. Steinfink *J. Solid State Chem.*, vol. 9, no. 1, pp. 6–14, 1974.
- [56] S. Leoni, W. Carrillo, W. Schnelle, and Y. Grin *Solid State Sci.*, vol. 5, no. 1, pp. 139–148, 2003.
- [57] Y. C. Wang and F. J. DiSalvo *J. Solid State Chem.*, vol. 156, no. 1, pp. 44–50, 2001.
- [58] M. De Jong, W. Chen, T. Angsten, A. Jain, R. Notestine, A. Gamst, M. Sluiter, C. K. Ande, S. Van Der Zwaag, J. J. Plata, C. Toher, S. Curtarolo, G. Ceder, K. A. Persson, and M. Asta *Sci. Data*, vol. 2, p. 150009, 2015.
- [59] A. Bhardwaj, A. Rajput, A. Shukla, J. Pulikkotil, A. Srivastava, A. Dhar, G. Gupta, S. Auluck, D. Misra, and R. Budhani *RSC Adv.*, vol. 3, no. 22, pp. 8504–8516, 2013.
- [60] Q. Cao, H. Zhang, M. Tang, H. Chen, X. Yang, Y. Grin, and J. Zhao *J. Appl. Phys.*, vol. 107, no. 5, p. 053714, 2010.
- [61] F. Gascoin, S. Ottensmann, D. Stark, S. M. Haïle, and G. J. Snyder *Adv. Funct. Mater.*, vol. 15, no. 11, pp. 1860–1864, 2005.
- [62] K. Guo, Q. Cao, X. Feng, M. Tang, H. Chen, X. Guo, L. Chen, Y. Grin, and J. Zhao *Eur. J. Inorg. Chem.*, vol. 2011, no. 26, pp. 4043–4048, 2011.
- [63] J. Shuai, Y. Wang, Z. Liu, H. S. Kim, J. Mao, J. Sui, and Z. Ren *Nano Energy*, vol. 25, pp. 136–144, 2016.
- [64] J. Shuai, H. Geng, Y. Lan, Z. Zhu, C. Wang, Z. Liu, J. Bao, C.-W. Chu, J. Sui, and Z. Ren *Proc. Natl. Acad. Sci. U.S.A.*, vol. 113, no. 29, p. E4125–E4132, 2016.

- [65] E. S. Toberer, A. F. May, B. C. Melot, E. Flage-Larsen, and G. J. Snyder *Dalton Trans.*, vol. 39, no. 4, pp. 1046–54, 2010.
- [66] X. Wang, M. Tang, H. Chen, X. Yang, J. Zhao, U. Burkhardt, and Y. Grin *Appl. Phys. Lett.*, vol. 94, no. 9, p. 092106, 2009.
- [67] T. A. Wubieneh, P. C. Wei, C. C. Yeh, S. y. Chen, and Y. Y. Chen *J. Electron. Mater.*, vol. 45, no. 3, pp. 1942–1946, 2016.
- [68] C. Yu, T. Zhu, S. Zhang, X. Zhao, J. He, Z. Su, and T. M. Tritt *J. Appl. Phys.*, vol. 104, no. 1, p. 013705, 2008.
- [69] H. Zhang, J. Zhao, Y. Grin, X. Wang, Tang, Meibo, Z. Man, H. Chen, and X. Yang *J. Chem. Phys.*, vol. 129, no. 16, p. 164713, 2008.
- [70] L. Zhang and D. J. Singh *Phys. Rev. B*, vol. 79, no. 9, p. 094528, 2009.
- [71] H. Zhang, M. Baitinger, M. Tang, Z. Man, H. Chen, X. Yang, Y. Liu, L. Chen, Y. Grin, and J. Zhao *Dalton Trans.*, vol. 39, no. 4, pp. 1101–1104, 2010.
- [72] H. Zhang, L. Fang, M. Tang, H. Chen, X. Yang, X. Guo, J. Zhao, and Y. Grin *Intermetallics*, vol. 18, no. 1, pp. 193–198, 2010.
- [73] H. Zhang, M. Tang, W. Schnelle, M. Baitinger, Z. Man, H. Chen, X. Yang, J. Zhao, and Y. Grin *J. Electron. Mater.*, vol. 39, no. 9, pp. 1772–1776, 2010.
- [74] J. Zhang, L. Song, G. K. Madsen, K. F. Fischer, W. Zhang, X. Shi, and B. B. Iversen *Nat. Commun.*, vol. 7, 2016.
- [75] A. Zevalkink, W. G. Zeier, E. Cheng, G. J. Snyder, J.-P. Fleurial, and S. Bux *Chem. Mater.*, vol. 26, no. 19, pp. 5710–5717, 2014.
- [76] L. Song, J. Zhang, and B. B. Iversen *J. Mater. Chem.*, vol. 5, no. 10, pp. 4932–4939, 2017.
- [77] J. Shuai, Y. Wang, H. S. Kim, Z. Liu, J. Sun, S. Chen, J. Sui, and Z. Ren *Acta Mater.*, vol. 93, pp. 187–193, 2015.
- [78] M. Wood, S. Ohno, U. Aydemir, and G. J. Snyder, “Optimizing the thermoelectric properties of the  $\text{CaZn}_2\text{Sb}_2$  -  $\text{CaMg}_2\text{Sb}_2$  solid solution through carrier doping and alloy scattering,” 2018.
- [79] J. Shuai, H. S. Kim, Z. Liu, R. He, J. Sui, and Z. Ren *Appl. Phys. Lett.*, vol. 108, no. 18, p. 183901, 2016.
- [80] J. Shuai, Z. Liu, H. S. Kim, Y. Wang, J. Mao, R. He, J. Sui, and Z. Ren *J. Mater. Chem. A*, vol. 4, no. 11, pp. 4312–4320, 2016.
- [81] J. Zhang, L. Song, A. Mamakhel, M. R. V. Joergensen, and B. B. Iversen *Chem. Mater.*, vol. 29, no. 12, pp. 5371–5383, 2017.
- [82] J. Zhang, L. Song, S. H. Pedersen, H. Yin, L. T. Hung, and B. B. Iversen *Nat. Commun.*, vol. 8, p. 13901, 2017.
